# Supplementary material for: Sexting Prevalence and Socio-Demographic Correlates in Spanish Secondary School Students
Source: Springer Nature journal article supplement (doi:10.1007/s13178-020-00434-0), 2020-02-13
Supplement: MOESM1 [file 17701040]

| **1. Sex** | ⎕ Male | **2. Type of School** | ⎕ State school | **3. Age:** ____ years | | **4. School grade:** ____ | | |
| --- | --- | --- | --- | --- | --- | --- | --- | --- |
|  | ⎕ Female |  | ⎕ Charter school | |  | |  |  | |

| **5. Family situation** |  |
| --- | --- |
| ⎕ Living with both parents | ⎕ Living with my father or mother and his or her current partner |
| ⎕ Living with my father and not my mother | ⎕ I have ____ brother(s) / sister(s) |
| ⎕ Living with my mother and not my father | ⎕ Other family members: |
|  |  |
| **6. Current family work status** |  |
| ⎕ Only my father works | ⎕ Neither of my parents works |
| ⎕ Only my mother works | ⎕ Another situation: __________ |
| ⎕ Both my parents work |  |
|  |  |
| **7. Is this your first year at this school?** | **8. Have you repeated a grade?** |
| ⎕ Yes | ⎕ Yes, in this school |
| ⎕ No | ⎕ Yes, in another school |
|  | ⎕ No |

| **9. Expected result in Math** | **10. Expected result in Spanish** |
| --- | --- |
| ⎕ I will fail | ⎕ I will fail |
| ⎕ I will pass (Pass or Good) | ⎕ I will pass (Pass or Good) |
| ⎕ I will get a good mark (Merit or Distinction) | ⎕ I will get a good mark (Merit or Distinction) |
|  |  |

**11. How many technological devices (e.g. cell phone, tablet, computer) do you use on a typical weekday?** ____ **devices.**

**12. For approximately how many hours a day do you use such devices?** ____ **hours.**

**13. How frequently do you use a …?**

|  | Daily | Several days a week | Several days a month | Almost never | Never |
| --- | --- | --- | --- | --- | --- |
| Cell phone |  |  |  |  |  |
| Tablet |  |  |  |  |  |
| Computer |  |  |  |  |  |
| **Others** |  |  |  |  |  |
| - |  |  |  |  |  |
| - |  |  |  |  |  |

| **14. Do you use social media?** ⎕ Yes ⎕ No | | | **15. Number of social media platforms you use:** _____ | | |
| --- | --- | --- | --- | --- | --- |
| **16. How often do you use them?** | | | | | |
| ⎕ Daily | ⎕ Several days a week | ⎕ Several days a month | | ⎕ Almost never | ⎕ Never |

| **17. Sort by frequencies what type of non-sexual content is the most you exchange over the internet (regardless of the device used).** Answer: 1 = more frequent; 5 = Less frequent. | | | | | |
| --- | --- | --- | --- | --- | --- |
| **Send** | | **Receive** | | **Forward** | |
| Text messages | ___ | Text messages | ___ | Text messages | ___ |
| Photos | ___ | Photos | ___ | Photos | ___ |
| Videos | ___ | Videos | ___ | Videos | ___ |
| Audios | ___ | Audios | ___ | Audios | ___ |
| Links | ___ | Links | ___ | Links | ___ |
| Other | ___ | Other | ___ | Other | ___ |

| **18. Sexting experiences** | Very often | Often | Occasionally | At least once | Never |
| --- | --- | --- | --- | --- | --- |
| 1. I have SENT erotic or provocative content, such as a text message, photo, audio or video of myself, to a person I know via cell phone or internet. |  |  |  |  |  |
| 1. I have RECEIVED erotic or provocative content, such as a text message, photo, audio or video of someone I know via cell phone or internet. |  |  |  |  |  |
| 1. I have FORWARDED erotic or provocative content, such as a text message, photo, audio or video of someone I know via cell phone or internet. |  |  |  |  |  |
| Another similar situation: |  |  |  |  |  |

| **19. If you have answered positively to any of the items in question 18, what kind of erotic and provocative content have you sent or received?** (Multiple responses allowed): | | | | | |
| --- | --- | --- | --- | --- | --- |
| ⎕ Text messages | ⎕ Pictures | ⎕ Videos | ⎕ Audios | ⎕ Links | ⎕ Other: ___ |

| **20. If you have answered positively to question 18 b), mark with an X the protagonists of such content** (Multiple responses allowed) | |
| --- | --- |
| ⎕ Adolescent males I know | ⎕ Adolescent females I know |
| ⎕ Adolescent males at my school | ⎕ Adolescent females at my school |
| ⎕ Adolescent males I don’t know | ⎕ Adolescent females I don’t know |
| ⎕ Adults I know | ⎕ Adults I don’t know |

| **23. Do you think any educational measures should be implemented in schools to inform you of such practices?** | |
| --- | --- |
| ⎕ Yes | ⎕ No |

| **21. I have RECEIVED this content** (multiple responses allowed) | |
| --- | --- |
| ⎕ Via a one-to-one channel | ⎕ Via a group channel |

| **22. Was the content of these messages intended to hurt the protagonist?** | | | |
| --- | --- | --- | --- |
| ⎕ Yes, of course | ⎕ Maybe | ⎕ I don’t think so | ⎕ Of course not |
